# Supplementary material for: TGF-β3-expressing CD4+CD25−LAG3+ regulatory T cells control humoral immune responses
Source: PubMed Central journal article supplement (PMC4346620; doi:10.1038/ncomms7329), 2015-02-19
Supplement: ncomms7329-s1.pdf [file ncomms7329-s1.pdf]

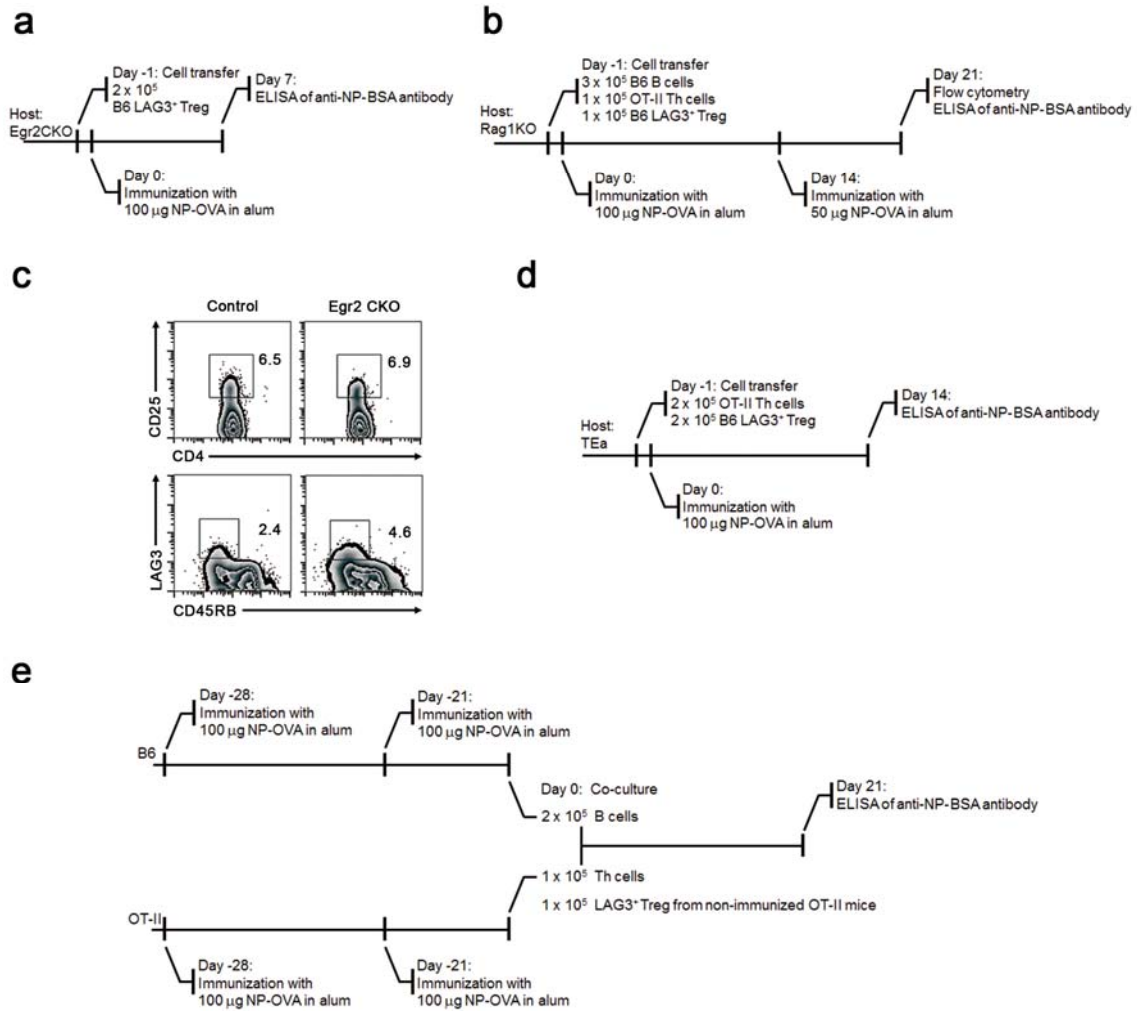

**Supplementary Figure 1. LAG3<sup>+</sup> Treg-mediated regulation of germinal center B cells and follicular helper T cells is Egr2-dependent.** (a) Diagrammatic representation of the experimental protocol for the NP-specific antibody responses of WT and *Egr2*<sup>fl/fl</sup> CD4-*Cre*<sup>+</sup> (*Egr2* CKO) mice immunized once with 100  $\mu$ g NP-OVA/alum with or without adoptive transfer of WT LAG3<sup>+</sup> Treg. The serum levels of anti-NP-BSA antibodies were analyzed by ELISA 7 d after immunization. (b) Diagrammatic representation of the experimental

protocol for cell transfer into Rag1-deficient (Rag1KO) mice immunized twice with NP-OVA/alum. C57BL/6 (B6) B cells and OT-II CD4<sup>+</sup>CD25<sup>-</sup>LAG3<sup>-</sup> helper T (Th) cells were injected *i.v.* into Rag1KO mice in combination with or without LAG3<sup>+</sup> Treg from B6 mice 1 d before the *i.p.* immunization with NP-OVA/alum, and given a booster immunization 14 d after the primary immunization. Anti-NP-BSA antibodies in sera were analyzed by ELISA 7 d after the booster immunization. (c) Splenic LAG3<sup>+</sup> Treg in Egr2 CKO mice. Dot plots were gated on CD4<sup>+</sup> T cells (upper panels) and CD4<sup>+</sup>CD25<sup>-</sup> T cells (lower panels). Numbers indicate the percentage of cells contained within the rectangular regions. The data shown are representative of four independent experiments. (d) Diagrammatic representation of the experimental protocol for LAG3<sup>+</sup> Treg transfer into TEa TCR transgenic mice. LAG3<sup>+</sup> Treg from B6 mice and OT-II Th cells were injected *i.v.* into TEa mice and subsequently immunized with NP-OVA/alum once. Anti-NP-BSA antibody levels were determined by ELISA. (e) *In vitro* NP-specific antibody production. B cells and Th cells purified from NP-OVA/alum-pre-immunized B6 mice and OT-II mice, respectively, were incubated with or without LAG3<sup>+</sup> Treg from non-immunized OT-II mice in the presence or absence of anti-FasL blocking antibody, and supernatants were analyzed for anti-NP-BSA antibodies by ELISA.

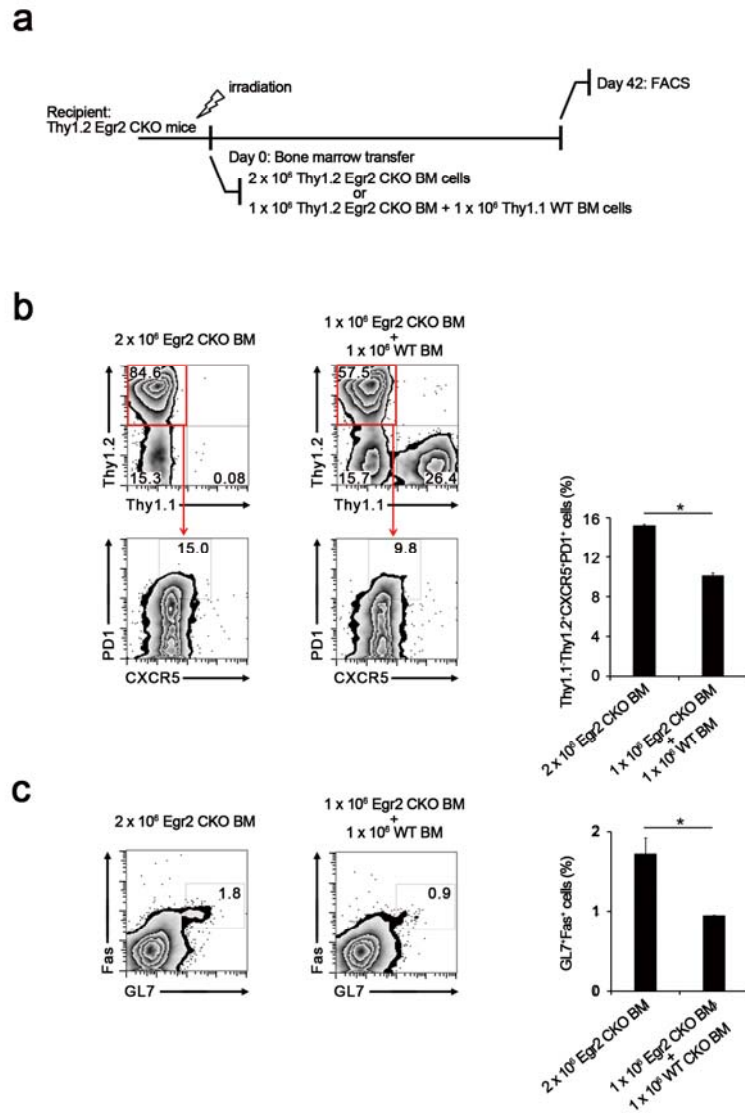

**Supplementary Figure 2. Bone marrow chimeras of Egr2 CKO mice reconstituted with wild-type and/or Egr2 CKO bone marrow cells (a)** Diagrammatic representation of the experimental protocol for the bone marrow (BM) transfer experiment. Lethally irradiated Thy1.2<sup>+</sup> Egr2 CKO recipients were reconstituted with 2 x 10<sup>6</sup> Thy1.2<sup>+</sup> Egr2 CKO BM cells or a mixture of 1 x 10<sup>6</sup> Thy1.2<sup>+</sup> Egr2 CKO and 1 x 10<sup>6</sup> Thy1.1<sup>+</sup> wild-type (WT)

BM cells. **(b, c)** Flow cytometry plots and quantification of CD4<sup>+</sup>CD25<sup>-</sup>CXCR5<sup>+</sup>PD-1<sup>+</sup> T<sub>FH</sub> (b) and B220<sup>+</sup>GL-7<sup>+</sup>Fas<sup>+</sup> GCB (c) 6 weeks after BM transfer ( $n = 4$  per group). Percent chimerism was determined in the spleen of the recipient mice by staining for Thy1.1 and Thy1.2 (left upper panels) (b). \* $P < 0.05$  (unpaired two-tailed Student's  $t$ -test). Data are representative of three independent experiments. The means  $\pm$  s.d. are indicated.

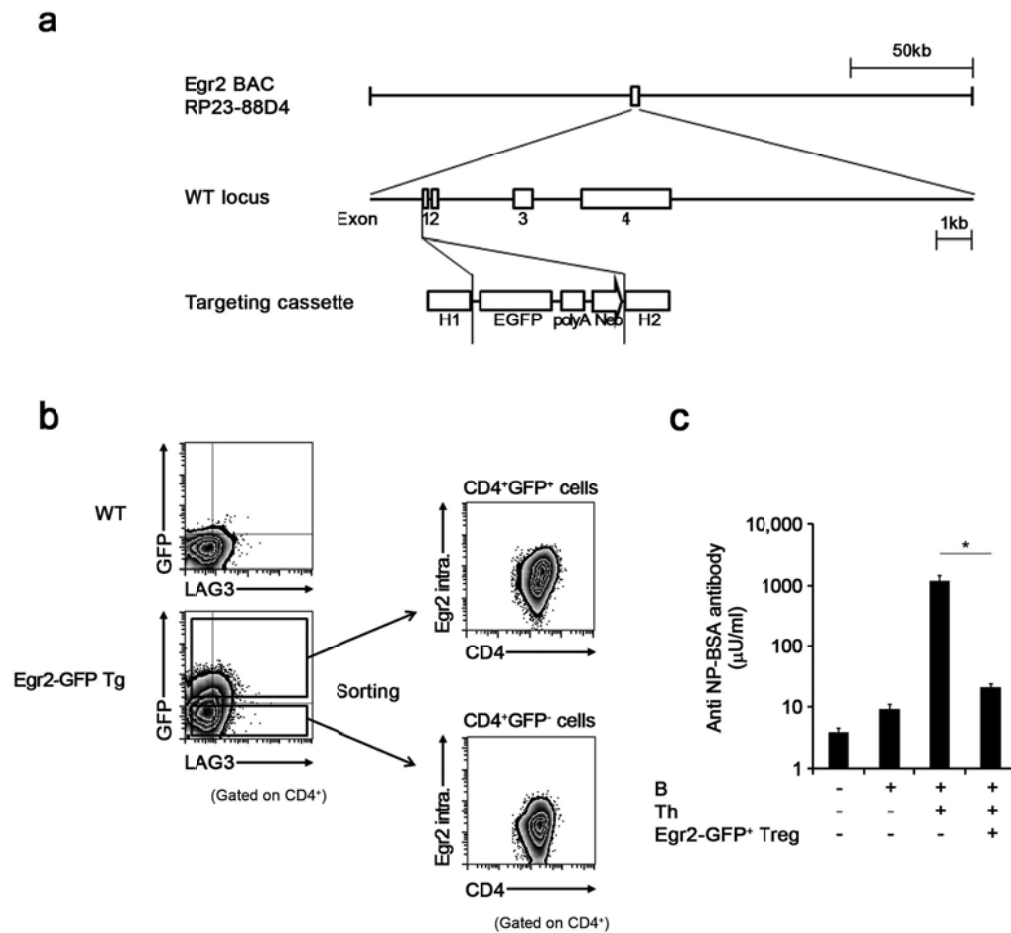

**Supplementary Figure 3. Regulatory activity of CD4<sup>+</sup>CD25<sup>+</sup>Egr2-GFP<sup>+</sup> T cells from Egr2-GFP transgenic mice.** (a) A schematic representation of the targeting strategy using an *Egr2* BAC clone (RP23-884D) to produce *Egr2*-GFP transgenic mice (*Egr2*-GFP mice). A part of the *Egr2* coding region was replaced by the EGFP-SV40 poly A cassette. H1 and H2, homology arms; Neo, neomycin-resistant gene. (b) GFP expression in *Egr2*-GFP mice. The sorting strategy of CD4<sup>+</sup> cells into CD4<sup>+</sup>GFP<sup>+</sup> and CD4<sup>+</sup>GFP<sup>-</sup> cells from *Egr2*-GFP mice is shown in the lower left panel. Re-sorted T cells were stained intracellularly with an

anti-Egr2 monoclonal antibody (mAb). Data are representative of three independent experiments. (c) CD4<sup>+</sup>CD25<sup>-</sup>Egr2-GFP<sup>+</sup> T cell-mediated *in vivo* B cell suppression. NP-specific antibody responses of Rag1KO mice injected with B6 B cells and OT-II Th cells in combination with or without CD4<sup>+</sup>CD25<sup>-</sup>Egr2-GFP<sup>+</sup> T cells (Egr2-GFP<sup>+</sup> Treg) from Egr2-GFP mice ( $n = 6$  per group). Anti-NP antibody levels were determined as in **Fig. 1e**. Statistical analyses were performed using one-way analysis of variance (ANOVA) with Bonferroni post-test ( $*P < 0.05$ ). The means  $\pm$  s.d. are indicated.

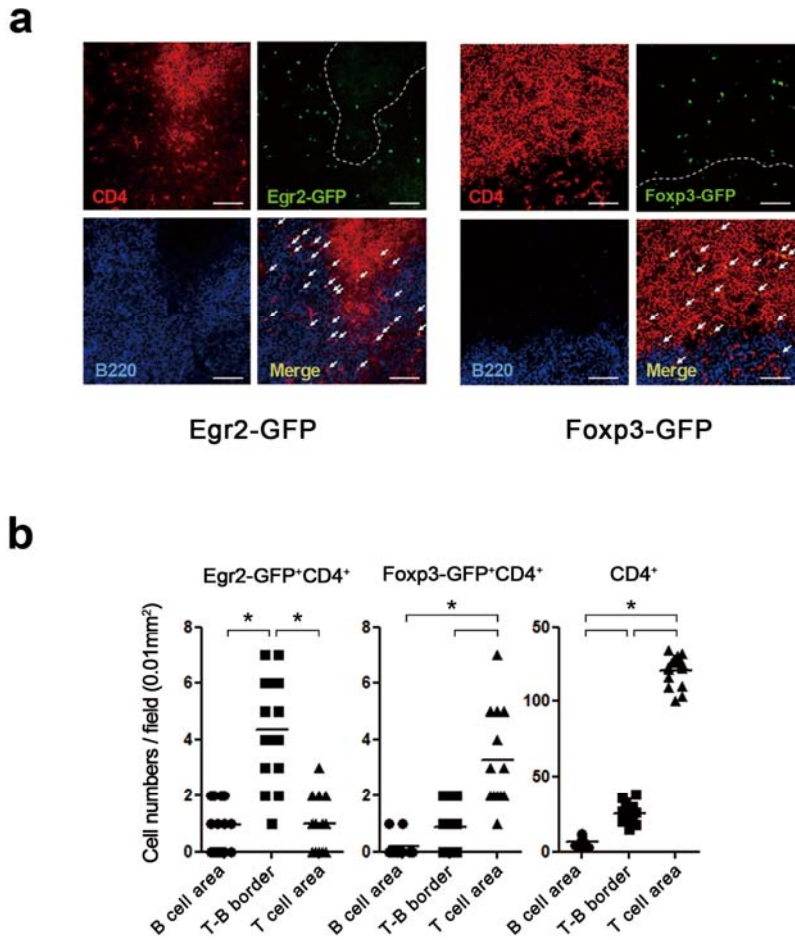

**Supplementary Figure 4. Localization of Egr2<sup>+</sup>CD4<sup>+</sup> T cells and Foxp3<sup>+</sup>CD4<sup>+</sup> T cells.**

(a) Representative immunofluorescence staining of frozen sections of splenic tissue harvested from Egr2-GFP (left panels) and Foxp3-GFP mice (right panels). Tissue sections were stained for CD4 (red), B220 (blue), and GFP (green). White arrows indicate CD4<sup>+</sup> T cells expressing Egr2-GFP or Foxp3-GFP. (b) Frequencies of Egr2-GFP<sup>+</sup>CD4<sup>+</sup> T cells and Foxp3-GFP<sup>+</sup>CD4<sup>+</sup> T cells (cell numbers per field; each field 0.01 mm<sup>2</sup>). Statistical analyses were performed using one-way ANOVA with Bonferroni post-test (\**P* < 0.05). The means ± s.d. are indicated.

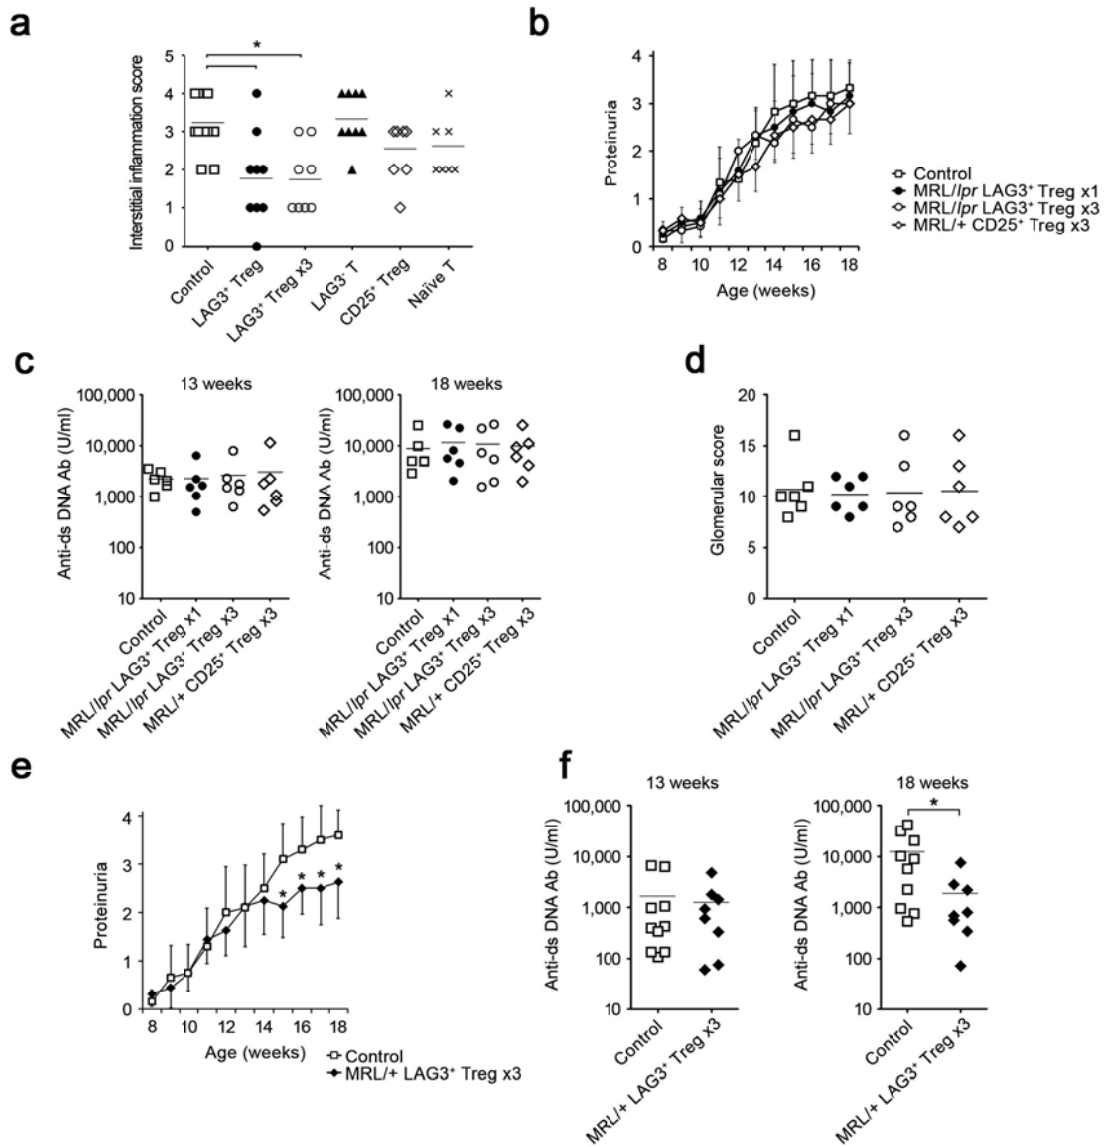

**Supplementary Figure 5. LAG3<sup>+</sup> Treg ameliorate systemic lupus erythematosus in the murine model.** (a) Interstitial inflammation scores of kidney sections. At 10 weeks of age, MRL/lpr mice in the treatment group were injected *i.v.* with CD4<sup>+</sup>CD25<sup>-</sup>LAG3<sup>+</sup> Treg (LAG3<sup>+</sup> Treg) ( $n = 9$ ), CD4<sup>+</sup>CD25<sup>-</sup>LAG3<sup>-</sup> T cells (LAG3<sup>-</sup> T) ( $n = 9$ ), CD4<sup>+</sup>CD25<sup>+</sup> Treg (CD25<sup>+</sup> Treg) ( $n = 9$ ), or CD4<sup>+</sup>CD25<sup>-</sup>CD45RB<sup>high</sup> T cells (naïve T) ( $n = 8$ ) from MRL/+ mice ( $1 \times 10^5$  cells each). In one group (LAG3<sup>+</sup> Treg x3) ( $n = 8$ ), mice were first injected



with LAG3<sup>+</sup> Treg (1 x 10<sup>5</sup> cells) at 10 weeks of age followed by a twice-weekly injection. Mice in the control group received PBS (*n* = 13). The data source is identical to **Fig. 2a-d**. Interstitial inflammation in each kidney section was graded by standard methods, as described in **Methods**. \**P* < 0.05 (Mann-Whitney *U*-test). **(b-d)** MRL/*lpr* mice treated with LAG3<sup>+</sup> Treg from MRL/*lpr* mice or CD25<sup>+</sup> Treg from MRL/+ mice (*n* = 6 per group). All other conditions were identical to **Supplementary Figure 5a**, except that LAG3<sup>+</sup> Treg from MRL/*lpr* mice (x1 and x3) and CD25<sup>+</sup> Treg from MRL/+ mice (x3) were used. *n* = 6 mice per group. The levels of proteinuria **(b)** \**P* < 0.05 *vs* control group (Mann-Whitney *U*-test), anti-ds DNA antibodies **(c)** \**P* < 0.05 (Bonferroni post-test), and glomerular scores **(d)** \**P* < 0.05 (Mann-Whitney *U*-test) were examined using the same methods as in **Fig. 2a-d**. **(e,f)** Three time injections of LAG3<sup>+</sup> Treg after the onset of overt proteinuria. MRL/*lpr* mice were first injected with LAG3<sup>+</sup> Treg from MRL/+ mice (1 x 10<sup>5</sup> cells) at 13 weeks of age followed by a twice weekly injection (MRL/+ LAG3<sup>+</sup> Treg x3). Mice in the control group received PBS. The levels of proteinuria **(e)** and anti-ds DNA antibodies **(f)** were examined using the same methods as in **Fig. 2a,b** (Control, *n* = 10; LAG3<sup>+</sup> Treg x3, *n* = 8). Statistical significances in **e** were analyzed by Mann-Whitney *U*-test, and **f** were analyzed by unpaired two-tailed Student's *t*-test (\**P* < 0.05). The means ± s.d. are indicated.

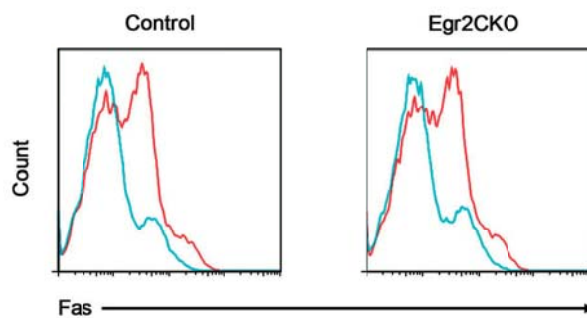

**Supplementary Figure 6. Expression of Fas in Egr2 CKO mice.** Freshly isolated splenic CD4<sup>+</sup> T cells from WT (*Egr2<sup>fl/fl</sup> CD4-Cre<sup>-</sup>*, left panel) and Egr2 CKO mice (*Egr2<sup>fl/fl</sup> CD4-Cre<sup>+</sup>*, right panel) were incubated in anti-CD3 mAb-coated 96-well culture plates at 1 x 10<sup>5</sup> cells per well for 72 h. Representative histograms show LAG3 positive (red line) or LAG3 negative cells (blue line). Histograms are gated on CD4<sup>+</sup> T cells. Representative data from three independent experiments are shown.

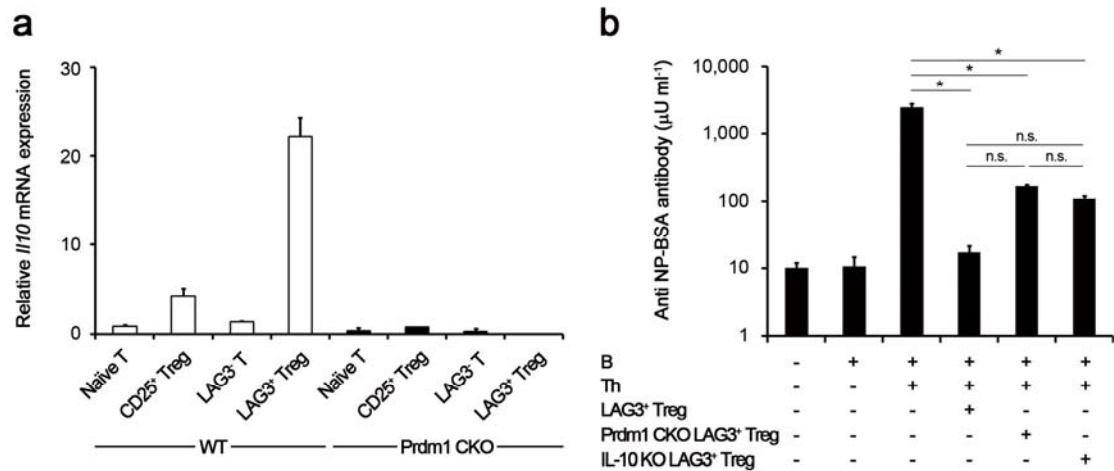

**Supplementary Figure 7. LAG3<sup>+</sup> Treg in Prdm1 CKO and IL-10KO mice.** (a) *Il10* mRNA expression by sorted T cell subsets taken from the spleens of WT B6 or Prdm1 CKO mice (*Prdm1<sup>fl/fl</sup> CD4-Cre<sup>-</sup>*). The four distinct T cell subsets are as follows: (naïve T) CD4<sup>+</sup>CD25<sup>-</sup>LAG3<sup>-</sup>CD45RB<sup>high</sup> cells; (CD25<sup>+</sup> Treg) CD4<sup>+</sup>CD25<sup>+</sup>LAG3<sup>-</sup> cells; (LAG3<sup>-</sup> T) CD4<sup>+</sup>CD25<sup>-</sup>LAG3<sup>-</sup> T cells; (LAG3<sup>+</sup> Treg) CD4<sup>+</sup>CD25<sup>-</sup>LAG3<sup>+</sup> cells ( $n = 3$  per group). (b) NP-specific antibody responses of Rag1 KO mice injected with B6 B cells and OT-II Th cells in combination with or without LAG3<sup>+</sup> Treg from WT B6, Prdm1 CKO or IL-10 KO mice ( $n = 5$  per group). Anti-NP-BSA antibody levels were determined as in **Fig. 1e**. Statistical analyses were performed using one-way ANOVA with Bonferroni post-test ( $*P < 0.05$ ) ; n.s., not significant. See also **Supplementary Tables 1** and **2**. Data are representative of three independent experiments. The means  $\pm$  s.d. are indicated.

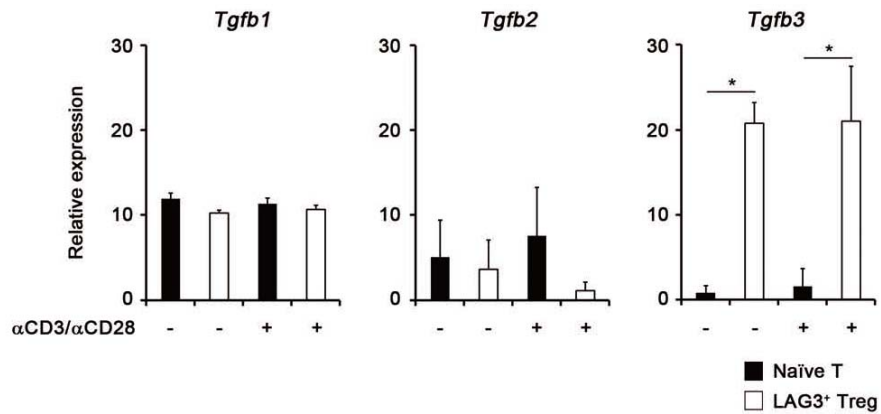

**Supplementary Figure 8. Expression of *Tgfb1*, *Tgfb2*, and *Tgfb3* mRNA in naïve T cells and LAG3<sup>+</sup> Treg.** Freshly isolated splenic naïve CD4<sup>+</sup> T cells and LAG3<sup>+</sup> Treg from B6 mice ( $n = 3$  per group) were stimulated with or without plate-bound 10  $\mu\text{g ml}^{-1}$  anti-CD3/ 5  $\mu\text{g ml}^{-1}$  anti-CD28 antibody for 48 h in RPMI-1640 medium supplemented with 10% FBS, and total RNA extracted from each subset was analyzed for *Tgfb1*, *Tgfb2*, and *Tgfb3* mRNA expressions. Statistical analyses were performed using unpaired two-tailed Student's *t*-test ( $*P < 0.05$ ). Data are representative of three independent experiments. The means  $\pm$  s.d. are indicated.

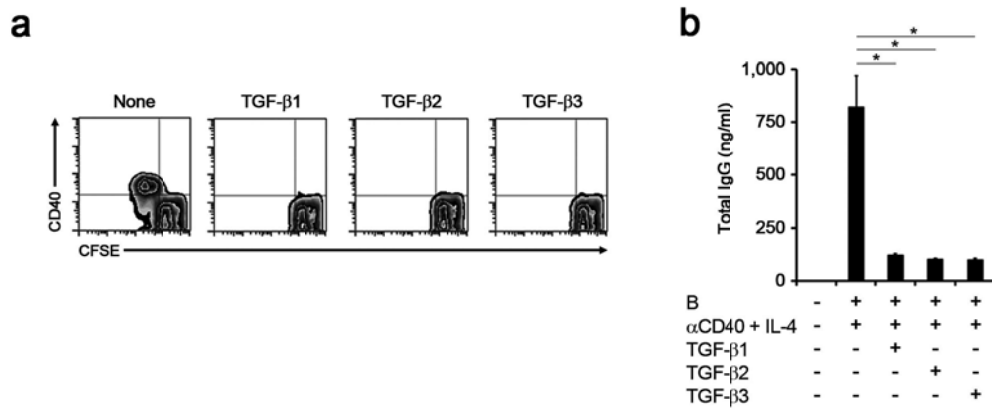

**Supplementary Figure 9. Suppression of B cell activation mediated by TGF-β1, 2, and 3.** (a) CFSE-labeled splenic B cells from naïve B6 mice were stimulated *in vitro* for 72 h with anti-IgM mAb in the presence or absence of rTGF-β1 (1 ng ml<sup>-1</sup>), rTGF-β2 (1 ng ml<sup>-1</sup>), or rTGF-β3 (1 ng ml<sup>-1</sup>). Dot plots are gated on B220<sup>+</sup> B cells. (b) The effects of rTGF-β1, 2, or 3 on total IgG production in the culture supernatants of anti-CD40/IL-4-stimulated B cells. Total IgG levels were determined as in Fig. 1d ( $n = 3$  per group). Data are representative of three independent experiments ( $n \geq 3$  mice per group). Statistical analyses were performed using one-way analysis of variance (ANOVA) with Bonferroni post-test ( $*P < 0.05$ ). Data are representative of three independent experiments. The means  $\pm$  s.d. are indicated.

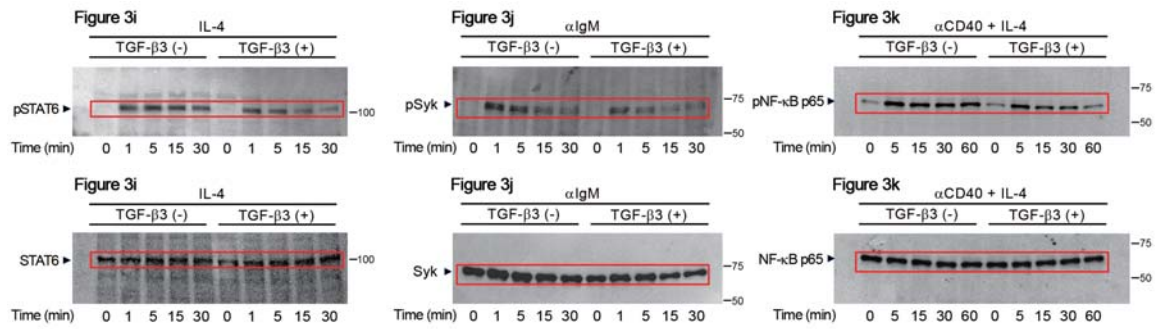

**Supplementary Figure 10. Full immunoblots with indicated areas of selection.**

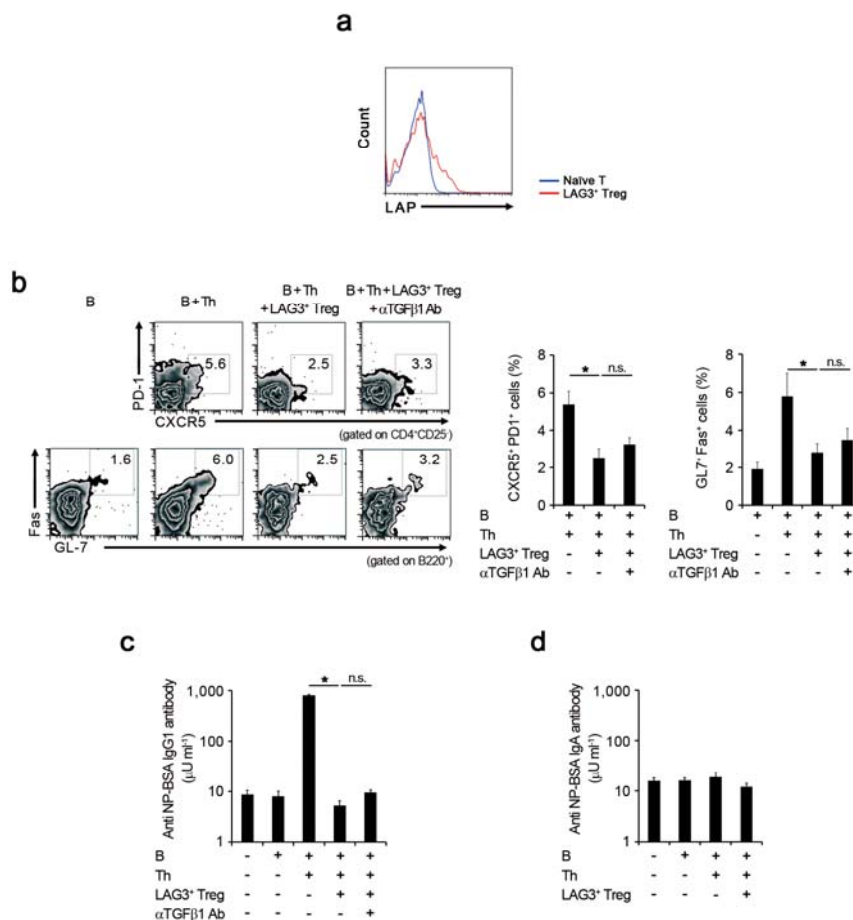

**Supplementary Figure 11. TGF-β1-independent suppression of humoral responses by LAG3<sup>+</sup> Treg.** (a) Expression of LAP-TGF-β1 on LAG3<sup>+</sup> Treg. Freshly isolated splenic naïve T cells and LAG3<sup>+</sup> Treg from B6 mice were stimulated with plate-bound anti-CD3/anti-CD28 antibody for 72 h in RPMI-1640 medium supplemented with 10% FBS. Representative histograms show naïve T cells (blue line) or LAG3<sup>+</sup> Treg (red line). Histograms are gated on CD4<sup>+</sup> T cells. (b) Flow cytometry plots and quantification of splenic CD4<sup>+</sup>CD25<sup>-</sup>CXCR5<sup>+</sup>PD1<sup>+</sup> T<sub>FH</sub> and B220<sup>+</sup>GL7<sup>+</sup>Fas<sup>+</sup> GCB. B6 B cells and OT-II Th cells were transferred with or without B6 LAG3<sup>+</sup> Treg into Rag1KO mice immunized twice with NP-OVA/alum, as described in **Supplementary Fig. 1b** (*n* = 6 per group). Anti-TGF-β1 blocking antibody (100 μg per mouse) was injected *i.v.* weekly. Numbers

indicate the percentage of cells contained within the rectangular regions. **(c)** Serum levels of anti-NP-specific IgG1 antibody from the same mice as in **b**. **(d)** Serum levels of anti-NP-specific IgA antibody from the same mice as in **b**. \* $P < 0.05$  as calculated by one-way ANOVA with Bonferroni post-test. The means  $\pm$  s.d. are indicated.



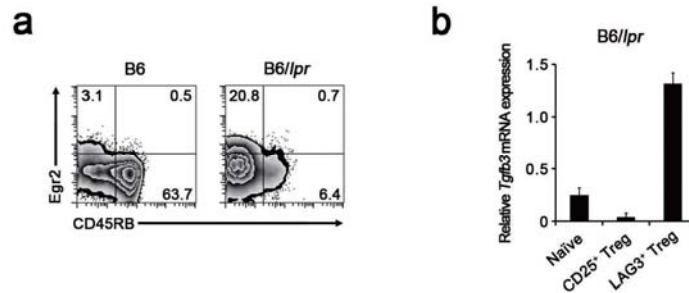

**Supplementary Figure 12. Fas-independent expression of *Tgfb3* mRNA in LAG3<sup>+</sup>**

**Treg. (a)** Splenic LAG3<sup>+</sup> Treg in B6 and B6/*lpr* mice. Dot plots were gated on CD4<sup>+</sup>CD25<sup>-</sup> T cells. Numbers indicate the percentage of cells contained within the quadrant regions. **(b)** Freshly isolated splenic naïve T cells, CD25<sup>+</sup> Treg, and LAG3<sup>+</sup> Treg from B6/*lpr* mice (*n* = 3 per group) were stimulated with plate-bound anti-CD3/anti-CD28 antibody for 48 h in RPMI-1640 medium supplemented with 10% FBS, and total RNA extracted from each subset was analyzed for *Tgfb3* mRNA expressions. Data are representative of three independent experiments. The means ± s.d. are indicated.

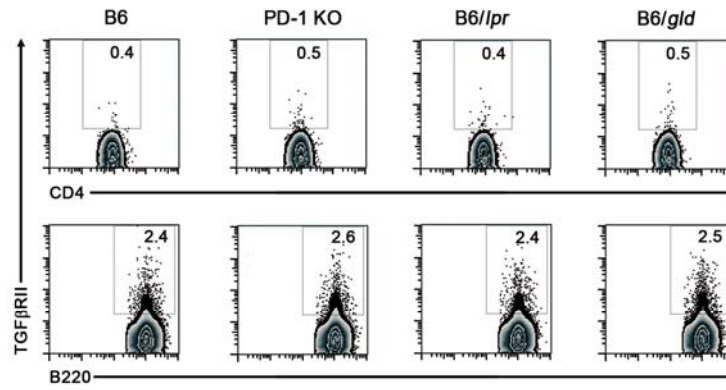

**Supplementary Figure 13. Expression of TGFβRII on T cells and B cells.** Freshly isolated splenocytes from B6, PD-1 KO, B6/*lpr*, and B6/*gld* mice were analyzed for the expression of TGFβRII. Dot plots were gated on CD4<sup>+</sup> T cells (upper panels) and B220<sup>+</sup> B cells (lower panels). Numbers indicate the percentage of cells contained within the rectangular regions. The data shown are representative of three independent experiments.

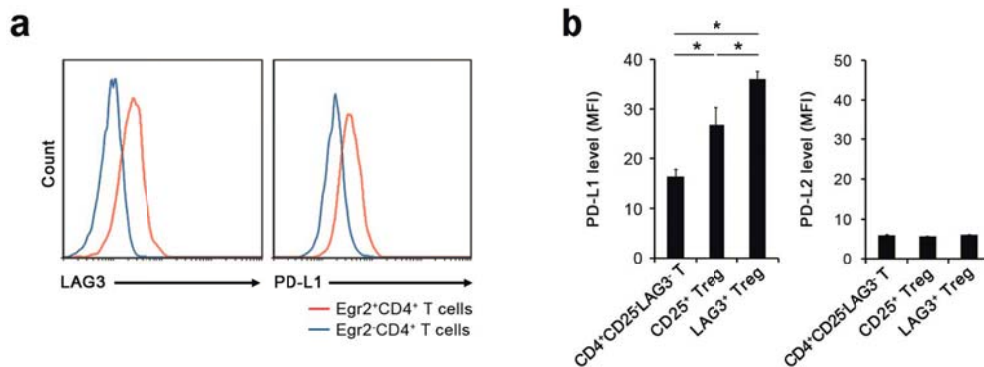

**Supplementary Figure 14. LAG3<sup>+</sup> Treg express PD-L1.** (a) Co-expression of LAG3 and PD-L1 on CD4<sup>+</sup>CD25<sup>+</sup>Egr2<sup>+</sup> T cells from the spleens of B6 mice. Freshly isolated splenic CD4<sup>+</sup>CD25<sup>-</sup> T cells were analyzed for the expression of LAG3 (left panel) and PD-L1 (right panel) according to their intracellular Egr2 expression. (b) Freshly isolated splenocytes from B6 mice were stained with anti-CD4 mAb, anti-CD25 mAb, anti-LAG3 mAb, and PD-L1 mAb or PD-L2 mAb. The mean fluorescent intensity (MFI) levels of PD-L1 (left panel) and PD-L2 (right panel) in CD4<sup>+</sup>CD25<sup>-</sup>LAG3<sup>-</sup> T cells, CD25<sup>+</sup> Treg, and LAG3<sup>+</sup> Treg are shown ( $n = 4$  per group). \* $P < 0.05$  as calculated by one-way ANOVA with Bonferroni post-test. Data are representative of three independent experiments. The means  $\pm$  s.d. are indicated.

**Supplementary Table 1. Mean and standard deviation of anti NP-BSA antibody titers in Supplementary Fig. 7**

|                | None | B     | B + Th  | B + Th +<br>LAG3 <sup>+</sup> Treg | B + Th +<br>Prdm1CKO<br>LAG3 <sup>+</sup> Treg | B + Th +<br>IL10KO<br>LAG3 <sup>+</sup> Treg |
|----------------|------|-------|---------|------------------------------------|------------------------------------------------|----------------------------------------------|
| <b>average</b> | 9.83 | 11.04 | 2424.80 | 16.74                              | 171.77                                         | 107.80                                       |
| <b>s.d.</b>    | 1.44 | 3.06  | 268.77  | 3.40                               | 5.08                                           | 9.97                                         |

(μU ml<sup>-1</sup>)

**Supplementary Table 2. Boferroni adjusted *P* values for multiple comparisons of anti NP-BSA antibody titers in Supplementary Fig. 7**

|                                                                                         | Adjusted <i>P</i><br>Value | Summary |
|-----------------------------------------------------------------------------------------|----------------------------|---------|
| <b>None vs B only</b>                                                                   | > 0.9999                   | n.s.    |
| <b>None vs B + Th</b>                                                                   | < 0.0001                   | *       |
| <b>None vs B + Th + LAG3<sup>+</sup> Treg</b>                                           | > 0.9999                   | n.s.    |
| <b>None vs B + Th + Prdm1CKO LAG3<sup>+</sup> Treg</b>                                  | 0.4271                     | n.s.    |
| <b>None vs B + Th + IL10KO LAG3<sup>+</sup> Treg</b>                                    | > 0.9999                   | n.s.    |
| <b>B only vs B + Th</b>                                                                 | < 0.0001                   | *       |
| <b>B only vs B + Th + LAG3<sup>+</sup> Treg</b>                                         | > 0.9999                   | n.s.    |
| <b>B only vs B + Th + Prdm1CKO LAG3<sup>+</sup> Treg</b>                                | 0.4434                     | n.s.    |
| <b>B only vs B + Th + IL10KO LAG3<sup>+</sup> Treg</b>                                  | > 0.9999                   | n.s.    |
| <b>B + Th vs B + Th + LAG3<sup>+</sup> Treg</b>                                         | < 0.0001                   | *       |
| <b>B + Th vs B + Th + Prdm1CKO LAG3<sup>+</sup> Treg</b>                                | < 0.0001                   | *       |
| <b>B + Th vs B + Th + IL10KO LAG3<sup>+</sup> Treg</b>                                  | < 0.0001                   | *       |
| <b>B + Th + LAG3<sup>+</sup> Treg vs B + Th + Prdm1CKO LAG3<sup>+</sup> Treg</b>        | 0.5285                     | n.s.    |
| <b>B + Th + LAG3<sup>+</sup> Treg vs B + Th + IL10KO LAG3<sup>+</sup> Treg</b>          | > 0.9999                   | n.s.    |
| <b>B + Th + Prdm1CKO LAG3<sup>+</sup> Treg vs B + Th + IL10KO LAG3<sup>+</sup> Treg</b> | > 0.9999                   | n.s.    |

Statistical analyses were performed using one-way ANOVA with Bonferroni post-test (\**P* < 0.05) ; n.s., not significant.
